# 1 **Linking microbial communities to ecosystem functions: what we** 2 **can learn from genotype-phenotype mapping in organisms**

3 **Andrew H. Morris, Kyle M. Meyer, Brendan J. M. Bohannon**

## 4 **Abstract**

5 Microorganisms mediate many important ecosystem functions, yet it remains unclear to what extent  
6 microbial diversity or community composition is important for determining the rates of ecosystem-  
7 scale functions. This uncertainty limits our ability to predict and manage crucial microbially-mediated  
8 processes, such as nutrient loss and greenhouse gas emissions. Our lack of understanding stems from  
9 the relatively large diversity of microorganisms, the difficulty in directly identifying functional groups,  
10 and our limited ability to manipulate microbial community attributes. For this reason, we propose that  
11 integrating traditional biodiversity-ecosystem function research with ideas from genotype-phenotype  
12 mapping could provide the new perspective our discipline needs. We identify three insights from  
13 genotype-phenotype mapping that could be useful for microbial biodiversity-ecosystem function  
14 studies: the concept of “agnostic” mapping, the use of more powerful ways to account for multiple  
15 comparisons, and the incorporation of covariates into models of ecosystem function. We illustrate the  
16 potential for these approaches to elucidate microbial biodiversity-ecosystem function relationships by  
17 analyzing a subset of published data measuring methane oxidation rates from incubations of tropical  
18 soil. We assert that combining the approaches of traditional biodiversity-ecosystem function research  
19 with ideas from genotype-phenotype mapping will not only generate novel hypotheses about how  
20 complex microbial communities drive ecosystem function, but also help scientists predict and manage  
21 changes to ecosystem functions resulting from human activities.

## 22 **1 Introduction**

### 23 **1.1 A new perspective on microbial community-ecosystem function** 24 **relationships is needed**

25 Ecologists have long investigated the effects of changing biodiversity on ecosystem function,  
26 documenting, for example, relationships between terrestrial plant community richness and primary  
27 productivity (1). The study of the relationship between microbial biodiversity and ecosystem functions  
28 is much more recent and has generated mixed results (2,3). Despite the fact that microbes mediate  
29 many important ecosystem functions, it remains maddeningly unclear to what extent microbial  
30 diversity or community composition is important for determining the rates of ecosystem-scale  
31 functions. For example, numerous studies have attempted to correlate microbial functional group  
32 abundance or diversity with the rate of various ecosystem functions and most are unsuccessful (4,5).  
33 This uncertainty limits our ability to predict and manage crucial microbially-mediated ecosystem  
34 functions, such as nutrient loss and greenhouse gas emissions. As a discipline, we need a new  
35 perspective on these questions.

36 Our lack of understanding stems from many sources. Microbial communities are much more  
37 diverse than those of plants and more abundant, and thus more difficult to sample comprehensively.  
38 Unlike plants, functional groups of microbes are rarely determined through observation or direct  
39 measurement, but rather must be indirectly inferred from environmental DNA, adding uncertainty. The  
40 ability to experimentally manipulate microbial diversity or community composition is much more  
41 limited for microbes. Given all of these differences (and many others), the challenge of linking

42 microbial communities to ecosystem functions may be less like that of plant communities, and more  
43 analogous to the complex task of linking genomic variation to organismal phenotypes. For this reason,  
44 we propose that integrating traditional biodiversity-ecosystem function research with ideas from  
45 genotype-phenotype mapping could provide the new perspective our discipline needs.  
46

## 47 **1.2 There is evidence that microbial diversity can matter**

48 Perhaps our uncertainty arises because there is no general relationship between microbial biodiversity  
49 and any particular ecosystem function. For example, if local selection always optimizes the available  
50 microbial biodiversity to maximize ecosystem function, then microbial community composition should  
51 not matter for predicting the rates of microbially-mediated functions. Instead, the rates of these  
52 functions should be determined by the underlying environmental variation. In this case, the microbial  
53 community would simply act as a conduit through which the abiotic environment alters ecosystem  
54 function. Attempts to document a general relationship between microbial community attributes and  
55 function would then fail (since the primary drivers are environmental).

56 However, there is evidence that this is not always the case. A limited number of studies have  
57 manipulated the connection between environmental factors and microbial community composition  
58 through “common garden” or reciprocal transplant experiments, and they frequently report different  
59 rates of ecosystem functions for different microbial communities under the same environmental  
60 conditions (6). This has been observed for plant decomposition (7,8), plant phenology (9), soil  
61 nitrogen cycling (10), and soil greenhouse gas emissions (11), among others. Therefore, variation in  
62 microbial community composition can be associated with variation in ecosystem function, independent  
63 of environmental variation. So why has this been difficult to consistently document in the field?  
64

## 65 **1.3 Traditional approaches to quantifying this relationship have 66 provided only minor improvements**

67  
68 Most comparative studies of microbial community function in the field focus on one of two aspects of  
69 microbial community structure that are hypothesized to predict ecosystem function. The first aspect is  
70 “functional” gene or transcript abundance. In this case, qPCR or shotgun metagenomic sequencing is  
71 used to estimate the abundance of a gene or transcript that is a putative marker for a microbial process  
72 (and thus a marker for the functional group that performs this process). For example, the gene *mcrA*,  
73 which encodes a subunit of the enzyme that performs the final step in methanogenesis, is commonly  
74 used as a marker for methanogenesis and for the methanogen functional group. Other examples include  
75 *pmoA* and methanotrophy, *nifH* and nitrification, and *nosZ* and denitrification. The abundance of these  
76 markers is often hypothesized to be predictive of the rate of their associated processes (for example, the  
77 abundance of *mcrA* is often hypothesized to be related to the rate of methanogenesis). There are  
78 examples where this relationship is present (12–14). However, a review of such studies found that the  
79 abundance of a functional gene or transcript is rarely correlated with the rate of the corresponding  
80 process and depends on the function of interest, with most effects either negative or not significant (4).

81 The second aspect of microbial community structure hypothesized to predict ecosystem  
82 function is taxonomic or functional diversity. Diversity is either estimated from sequence variants of a  
83 barcode gene such as the 16S rRNA gene or manipulated through some proxy of diversity such as  
84 sequential dilution or varying filter sizes. Studies that experimentally manipulate diversity generally  
85 find a relationship between the applied diversity treatment and ecosystem functions, including for  
86 methanotrophy (14), phosphorus leaching (15), greenhouse gas emissions (15), decomposition (16),

87 and nitrogen cycling (17). However, in many cases, richness is confounded with other factors such as  
88 the presence or absence of major phylogenetic groups (nematodes, fungi) or abundance of microbial  
89 cells. In addition, assembled microbial communities pose the same challenges as macroorganismal  
90 diversity experiments, for example the highest diversity treatment will more likely contain the most  
91 productive taxon. A review of microbial diversity studies shows that microbial community taxonomic  
92 and functional diversity add little explanatory power to models of ecosystem function (5). Overall,  
93 functional gene abundance and community diversity improve models of ecosystem function less than  
94 one third of the time and increase variance explained by an average of only 8 percentage points (5).  
95

## 96 **1.4 Genotype-phenotype mapping as a source of inspiration**

97 Given the relative lack of success to date, it is time to rethink how we approach the challenge of  
98 mapping microbial community structure to ecosystem function. Microbial ecologists are not the only  
99 biologists who are attempting to determine the relationship between a complex set of highly-variable  
100 data and an aggregate function. This kind of “many-to-one” mapping is analogous to the challenge of  
101 identifying the genetic basis of complex traits in organismal populations. In such “genotype-  
102 phenotype” mapping studies, a population exhibits variation in a phenotype (e.g. height or disease  
103 state) as well as variation in potentially thousands of single nucleotide polymorphisms (SNPs). To  
104 identify the genetic basis for a trait, investigators sample from this population and correlate phenotype  
105 with genotype. In most cases, there are many more loci than individuals and we do not know whether  
106 the SNPs are causally linked or are simply in linkage disequilibrium with a causal mutation.

107 There are a number of parallels between this challenge faced by organismal biologists and that  
108 facing microbial community ecologists. They are both “many-to-one” mapping challenges, which  
109 involve large numbers of statistical comparisons. Both are attempting to identify causal relationships  
110 that are potentially confounded by very complex patterns of covariation. There is often no strong  
111 expectation about which entities (i.e. which genomic regions or which microbial taxa) are most likely  
112 to be causally-related to phenotype or function, and thus “agnostic” approaches are needed. Both are  
113 sensitive to exactly how the “mapping” question is asked, and ultimately require manipulation (of  
114 genes or taxa) to establish causation. We describe each of these parallels below in more detail, and  
115 provide an example of how these ideas could be applied to microbial data.  
116

## 117 **1.5 The importance of a taxonomically “agnostic” approach**

118 The traditional approach to microorganismal biodiversity-ecosystem function research is to measure or  
119 manipulate the diversity of a taxonomic group (e.g. plants) and look for an association with the  
120 function performed by that group (e.g. primary productivity). In the broadest sense, we can think of  
121 plants as a “functional group”, i.e. a group of taxa united by their ability to perform a particular  
122 ecosystem function. Ecologists may further divide a functional group (e.g. plants) into smaller  
123 functional groupings (e.g. forbs), defined by the details of how they perform their particular ecosystem  
124 function.

125 However, for microbes our knowledge of functional groups is much more limited. From a very  
126 limited number of cultured isolates we have a provisional understanding of which microbes might be  
127 involved in some ecosystem functions. And by sequencing the genomes of these isolates, we have  
128 identified genetic markers for certain functions. But most microbial taxa remain uncultured and we do  
129 not know the function of most microbial taxa detected in environmental samples (18,19). In addition,  
130 there have been recent discoveries of functions in unexpected taxonomic groups, for example  
131 methanogenesis by fungi and cyanobacteria, a function previously considered restricted to the Archaea  
132 (20,21). Because of this, it would be prudent to look more agnostically at microbial communities to

133 identify taxa or groups of taxa that are important for predicting the rate of ecosystem functions rather  
134 than assuming that the genetic markers we have provisionally identified for a given function represent  
135 the most likely taxa involved. This agnostic approach is analogous to the approach of many genotype-  
136 phenotype mapping studies (e.g. genome-wide association studies, aka GWAS), which often look for  
137 associations between a phenotype and loci anywhere in a genome.  
138

## 139 **1.6 Dealing with multiple comparisons and covariation**

140  
141 Microbial biodiversity-ecosystem function studies and genotype-phenotype mapping studies are both  
142 “many-to-one” mapping challenges, which involve large numbers of statistical tests. Hundreds to  
143 thousands of tests are routinely made per study, greatly inflating the number of false positives identified  
144 using statistical hypothesis testing approaches. Some microbial biodiversity-ecosystem function  
145 studies do not correct for this, while others use approaches that may unnecessarily inflate the false  
146 negative rate, such as the Bonferroni correction. The Bonferroni correction has been widely considered  
147 to be too conservative, particular for exploratory studies designed to generate hypotheses (22–24).  
148 Statisticians have developed a number of less-conservative approaches to correct for multiple  
149 comparisons by controlling the false discovery rate in order to balance the tradeoff between Type I and  
150 Type II errors (25,26). These approaches are commonly used in genotype-phenotype mapping studies.

151 It is widely accepted that organisms, including microorganisms, exhibit population stratification  
152 due to geographic and environmental separation (27,28). Genome-wide association studies generally  
153 account for population structure due to shared ancestry among cases and controls when modeling the  
154 connection between genotype and phenotype. The classic example is the latitudinal gradient of both  
155 height and genotypic similarity in Europe, which results in spurious associations between human height  
156 and genetic variation (29,30). To correct for this covariance structure, GWAS models incorporate  
157 genotypic similarity to correct for shared ancestry using a variety of methods, such as principal  
158 component correction or variance component modeling (31,32). Typically, microbial biodiversity-  
159 ecosystem function studies do not account for population stratification (i.e. community similarity  
160 across samples), although there are some exceptions (33,34). GWAS generally ignores the underlying  
161 environmental and spatial distance between samples and instead uses shared ancestry as a proxy for  
162 these variables. However, community similarity (the community analogue of shared ancestry among  
163 organisms) is not as tightly linked to geography or environment as is shared ancestry among organisms,  
164 and it could be very useful to account for these separately in microbial studies, especially if one is  
165 particularly interested in how composition alters function independent of the underlying environmental  
166 variation.  
167

## 168 **2 An example: high-affinity methane oxidation**

169  
170 To illustrate the ideas outlined above, we reanalyzed a subset previously published data (33) using a  
171 modified procedure from the original version. A full description of the study design, samples, and data  
172 generation can be found in that manuscript. Briefly, these data were gathered from intact soil cores  
173 taken from diverse ecosystems of the Congo Basin in Gabon, Africa. Cores were incubated in the  
174 laboratory under different concentrations of methane to identify the rates of specific methane cycling  
175 pathways. For this example, we will analyze data from just one of these pathways, high-affinity  
176 methane oxidation (the oxidation of atmospheric concentrations of methane), which we will refer to  
177 below as “methane oxidation”. In addition, for simplicity we only include amplicon sequences from the



178 DNA-inferred community and not the RNA-inferred community, both of which are presented in the  
179 original paper (33). The data we analyzed include methane oxidation measurements, amplicon  
180 sequence variants (ASVs; (35)) generated using *DADA2* and inferred from 16S rRNA gene sequences,  
181 *pmoA* abundance estimates (via qPCR), latitude and longitude, and four environmental covariates (soil  
182 moisture, bulk density, carbon, and nitrogen).

183 Analyses were conducted in the *R* statistical environment using the *phyloseq* package (36,37).  
184 The relative abundances of ASVs were corrected using the variance stabilizing transformation from  
185 *DESeq2* (38,39). We first test typical measures of microbial structure including functional gene  
186 abundance and community richness, which was estimated using the *breakaway* package (40). We then  
187 demonstrate significant covariation between community structure (estimated as Bray-Curtis distance  
188 using *vegan*), environmental variation (euclidean distance), and geographic distance (euclidean  
189 distance) using Mantel tests (41,42). Finally, we present one approach to identifying taxa which are  
190 significantly associated with function independent of the environment by fitting variance component  
191 models using *varComp* to test the relationship between relative abundance of each ASV and methane  
192 oxidation rate (43). To illustrate how including different covariates (environmental, geographic, and  
193 community) can result in different conclusions about which taxa are associated with function, we fit  
194 this model with and without random effects variance components for environmental similarity,  
195 geographic site ID, and Bray-Curtis similarity. Significant taxa were determined by controlling the  
196 false discovery rate at  $q$ -value  $< 0.05$  (26). Figures were created using *ggplot2* (44).

197 Methane oxidation rate was not significantly correlated with *pmoA* gene abundance or richness  
198 (Table 1, Figure 1). We tested collinearity between each pair of distance matrices for community,  
199 environment, and geography using Mantel tests and estimated  $p$ -values by permutation. We found a  
200 moderate and significant correlation between community composition and environmental variation,  
201 geography and community composition, and geography and environmental variation (Table 2, Figure  
202 2). Principal coordinate plots show that beta diversity of samples separated by site ID and by ecosystem  
203 type (wetland or upland; Figure 2). Finally, we tested the effect of the relative abundance of each ASV  
204 on methane oxidation rate. We found different numbers of taxa significantly associated with methane  
205 oxidation depending on which covariates were included in the model (Table 3). In particular, 460 taxa  
206 were identified with no covariates whereas 6 were identified after including all covariates. Though we  
207 cannot infer function from 16S sequences, these 6 taxa fall into three genera and one class with  
208 cultured representatives that are not known to consume methane (45–48). Their effect on methane  
209 oxidation rate ranges from 0.5 to 1.5 (Figure 3). An effect of 1.5 means that for a one unit increase in  
210 relative abundance there is a 1.5 increase in  $k$  (the rate of exponential decrease in methane  
211 concentration over time).

212

### 213 **3 Discussion**

214

215 In this paper, we argue that the traditional approach to microbial biodiversity-ecosystem function  
216 research often ignores the complexity of microbial community dynamics, in particular the complex  
217 patterns of covariation that often arise among microbial community similarity, environmental  
218 similarity, and spatial proximity. We propose that a better approach would be to learn from other  
219 complex many-to-one mapping problems in biology, particularly genotype-phenotype mapping. These  
220 studies often explicitly account for covariation, they correct for multiple comparisons in powerful  
221 ways, and they frequently take an “agnostic approach” that does not assume a particular relationship  
222 between structure and function.

223 We illustrate the potential for these approaches to elucidate microbial biodiversity-ecosystem  
224 function relationships by analyzing a subset of published data from incubations of tropical soil. In this

225 example, soil cores from different ecosystems exhibited different rates of methane oxidation, but  
226 simple correlations between these rates and the diversity or abundance of putative methane oxidizing  
227 bacteria were not informative. These results agree with recent reviews of the literature that  
228 demonstrate that such simple approaches are often not a fruitful avenue for elucidating microbial  
229 structure-function connections.

230 We then asked if the relative abundance of particular taxa were related to ecosystem function,  
231 and we identified 460 taxa whose relative abundances were associated with rates of methane oxidation  
232 after controlling the false discovery rate ( $q$ -value  $< 0.05$ ). These taxa could be related to ecosystem  
233 function in multiple ways. The most interesting possibility is that each of these taxa is statistically  
234 related because it is causally connected to the function. This could be direct, for example an organism  
235 that consumes methane, or indirect, for example an organism that regulates substrates necessary for  
236 consumers of methane. In either of these cases, the taxon could be useful as a biomarker of function or  
237 as an organism to investigate in order to better understand the biological drivers of variation in methane  
238 oxidation.

239 Alternatively, a significant association could occur for non-causal reasons. For example, any  
240 organism that tends to be in high abundance where methane oxidation rates are high would be  
241 correlated with methane oxidation, even if it has no causal relationship. This could be because such an  
242 organism is favored under the same environmental conditions that favor methane oxidizing bacteria (or  
243 that favor methane oxidation in general). Such covariation can drive associations that are not causal,  
244 but the effects of such covariation can be reduced through a number of approaches (many developed by  
245 biologists interested in genotype-phenotype mapping).

246 In our example, we showed that the abundances of microbial taxa exhibit complex patterns of  
247 covariation with each other and with environmental conditions and spatial location. These  
248 biogeographic patterns might be even stronger if we could sample the populations more intensively  
249 (49). Once we account for this covariation, our list of taxa associated with function was reduced to 6.  
250 These 6 taxa include taxa that are not known to directly contribute to methane oxidation, suggesting  
251 that the drivers of methane oxidation may be indirect, perhaps mediated by ecological interactions  
252 among taxa from multiple functional groups.

253 This approach is powerful because it accounts for the covariances that arise from the  
254 fundamental ecological processes that drive community assembly and underlie biogeographical  
255 patterns (27,50). It is also powerful because it is focused on a much more specific version of the  
256 “biodiversity-ecosystem function” question, i.e. it asks “which taxa are *uniquely* associated with  
257 function?”. By “uniquely associated”, we mean those taxa associated with function irrespective of  
258 environmental conditions, local community structure, or spatial proximity. This is not only a more  
259 specific question than is usually asked in microbial biodiversity-ecosystem function studies, but it is  
260 also a more appropriate one, especially if one is interested in how to incorporate microbial community  
261 data into ecosystem models. For modeling what is usually important is to identify those taxa that add  
262 explanatory power beyond that provided by other factors (such as environmental conditions).

263 We identified three insights from genotype-phenotype mapping that could be useful for  
264 microbial biodiversity-ecosystem function studies: the concept of “agnostic” mapping, the use of more  
265 powerful ways to account for multiple comparisons, and the incorporation of covariates. But there are  
266 other insights to be gained as well. For example, some phenotypes (e.g. the propensity for diseases  
267 such as Parkinson's) are controlled by a single genetic locus (51,52). However, most phenotypes  
268 studied to date arise from the influence of many loci of small effect (as well as environmental factors;  
269 (53,54)). Organismal biologists have developed approaches tailored to identifying such loci; for  
270 example, by sampling organismal populations in a way that constrains genetic variation unrelated to  
271 phenotype. Similarly, for some ecosystem functions, it is possible that a single microbial taxon could  
272 substantially influence its rate. For example, methane flux from permafrost in Sweden may be  
273 controlled by a single taxon (55). However, most microbially-mediated ecosystem functions are likely

274 the result of interactions (direct and indirect) among many taxa. We could maximize our ability to  
275 identify taxa of small effect by constraining variation, e.g. by sampling microbial communities in a way  
276 that makes them similar in structure (similar ecosystem, soil type, and abiotic conditions) while still  
277 varying in function.

278 Ultimately, the relationships identified in genotype-phenotype mapping studies must be  
279 verified. There are multiple ways that this verification is accomplished. In some cases, organisms can  
280 be artificially selected for a particular phenotype (e.g. through experimental evolution in an  
281 environment that favors the phenotype of interest) and the genetic changes that occur in response to  
282 selection can be compared to those identified via mapping studies (such as GWAS). An analogous  
283 approach for microbial biodiversity-ecosystem function studies would be to apply artificial ecosystem  
284 selection (*sensu* (56)) on a given function and compare the taxa that change in response to selection  
285 with those identified via a comparative approach (such as the one illustrated in our example).

286 The most common way that loci identified in a mapping study are verified is through  
287 manipulative genetics. The identified loci can be knocked out or over-expressed, and the effect on  
288 phenotype compared to that predicted from mapping studies. There is no direct analogue for this in  
289 microbial biodiversity-ecosystem function studies. In some cases it may be possible to inhibit a  
290 particular functional group through the use of a specific antimicrobial or a chemical inhibitor (57), but  
291 this is not generally true. It may be possible in some cases to isolate a microorganism of interest in  
292 pure culture and add it back to a particular ecosystem, transiently increasing its abundance (roughly  
293 analogous to “overexpressing” a gene). Synthetic communities (contrived assemblages of  
294 microorganisms) may ultimately be the most powerful way to test hypotheses about microbial  
295 biodiversity-ecosystem function relationships, but currently these approaches are limited by the small  
296 number of taxa that can be routinely cultured from most environments.  
297

## 298 **4 Conclusion**

299  
300 Microbial biodiversity-ecosystem function research has demonstrated that functional group abundance  
301 (measured via genetic markers from environmental DNA) is often not a good predictor of ecosystem  
302 function and that microbial diversity metrics on average do not add much power to ecosystem models.  
303 A new perspective on how to determine the relationship between microbial communities and ecosystem  
304 functions is sorely needed. Organismal biologists have over a hundred years of experience identifying  
305 relationships between complex sets of highly-variable data (genotypes or genome sequences) and  
306 aggregate functions (organismal phenotypes). We assert that combining the approaches of traditional  
307 biodiversity-ecosystem function research with ideas from genotype-phenotype mapping could provide  
308 this new perspective. This integration could not only make underutilized approaches such as covariate  
309 modeling and artificial selection more available to microbial ecologists, but also provide instructive  
310 examples of how best to conceive of microbial biodiversity-ecosystem function questions. If this  
311 integration is successful, it is possible that in the not-so-distant future our field will be able to robustly  
312 identify taxa, genes, or even molecules that will allow us to accurately predict the response of  
313 ecosystems to environmental change. Doing so will not only generate novel hypotheses about how  
314 complex microbial communities drive ecosystem function, but also help scientists predict and manage  
315 changes to ecosystem functions resulting from human activities.  
316

## 317 **Acknowledgments**

318

319 This project was supported by the National Science Foundation – Dimensions of Biodiversity program  
320 (DEB 14422214), the National Science Foundation Graduate Research Fellowship Program (DGE  
321 1255832), and the ARCS Foundation Florence and Mike Nudelman Scholarship. The data re-analyzed  
322 here were generated with permission of the Government of Gabon, Centre National de la Recherche  
323 Scientifique et Technologique (Permit No AR0035/14/MESRS/CENAREST/CG/CST/CSAR) and the  
324 assistance of F. Bivigou, H. Memiaghe, L. Tchignoumba, E. Tobi, and I. Akendengue. The University  
325 of Oregon, the Gabon-Oregon Transnational Center on Environment and Development, the  
326 Smithsonian Conservation Biology Institute, and Shell Gabon provided financial and logistical support  
327 for the original study re-analyzed here. We also thank W. Cresko for insightful discussions on  
328 population genetics and H. Tavalire for contributions to the statistical analyses.  
329

## 330 **References**

1. Hooper DU, Chapin FS, Ewel JJ, Hector A, Inchausti P, Lavorel S, et al. EFFECTS OF BIODIVERSITY ON ECOSYSTEM FUNCTIONING: A CONSENSUS OF CURRENT KNOWLEDGE. *Ecological Monographs*. 2005 Feb;75(1):3–35, doi:10.1890/04-0922.
2. Schimel JP, Gullledge J. Microbial community structure and global trace gases. *Global Change Biology*. 1998;4:745–58, doi:10.1046/j.1365-2486.1998.00195.x.
3. Singh BK, Bardgett RD, Smith P, Reay DS. Microorganisms and climate change: terrestrial feedbacks and mitigation options. *Nature Reviews Microbiology*. 2010 Nov;8(11):779–90, doi:10.1038/nrmicro2439.
4. Rocca JD, Hall EK, Lennon JT, Evans SE, Waldrop MP, Cotner JB, et al. Relationships between protein-encoding gene abundance and corresponding process are commonly assumed yet rarely observed. *The ISME Journal*. 2015 Aug;9(8):1693–9, doi:10.1038/ismej.2014.252.
5. Graham EB, Knelman JE, Schindlbacher A, Siciliano S, Breulmann M, Yannarell A, et al. Microbes as Engines of Ecosystem Function: When Does Community Structure Enhance Predictions of Ecosystem Processes? *Front Microbiol* [Internet]. 2016 [cited 2019 Aug 15];7(214), doi:10.3389/fmicb.2016.00214. Available from: <https://www.frontiersin.org/articles/10.3389/fmicb.2016.00214/full>
6. Reed HE, Martiny JBH. Testing the functional significance of microbial composition in natural communities. *FEMS Microbiol Ecol*. 2007 Nov 1;62(2):161–70, doi:10.1111/j.1574-6941.2007.00386.x.
7. Glassman SI, Weihe C, Li J, Albright MBN, Looby CI, Martiny AC, et al. Decomposition responses to climate depend on microbial community composition. *Proceedings of the National Academy of Sciences*. 2018 Nov 20;115(47):11994–9, doi:10.1073/pnas.1811269115.
8. Strickland MS, Lauber C, Fierer N, Bradford MA. Testing the functional significance of microbial community composition. *Ecology*. 2009;90(2):441–51, doi:10.1890/08-0296.1.
9. Panke-Buisse K, Poole AC, Goodrich JK, Ley RE, Kao-Kniffin J. Selection on soil microbiomes reveals reproducible impacts on plant function. *The ISME Journal*. 2015 Apr;9(4):980–9, doi:10.1038/ismej.2014.196.



10. Balsler TC, Firestone MK. Linking microbial community composition and soil processes in a California annual grassland and mixed-conifer forest. *Biogeochemistry*. 2005 Apr 1;73(2):395–415, doi:10.1007/s10533-004-0372-y.
11. Cavigelli MA, Robertson GP. The Functional Significance of Denitrifier Community Composition in a Terrestrial Ecosystem. *Ecology*. 2000 May 1;81(5):1402–14, doi:10.1890/0012-9658(2000)081[1402:TFSODC]2.0.CO;2.
12. Freitag TE, Prosser JI. Correlation of Methane Production and Functional Gene Transcriptional Activity in a Peat Soil. *Appl Environ Microbiol*. 2009 Nov 1;75(21):6679–87, doi:10.1128/AEM.01021-09.
13. Freitag TE, Toet S, Ineson P, Prosser JI. Links between methane flux and transcriptional activities of methanogens and methane oxidizers in a blanket peat bog. *FEMS Microbiol Ecol*. 2010 Jul 1;73(1):157–65, doi:10.1111/j.1574-6941.2010.00871.x.
14. Schnyder E, Bodelier PLE, Hartmann M, Henneberger R, Niklaus PA. Positive diversity-functioning relationships in model communities of methanotrophic bacteria. *Ecology*. 2018 Mar;99(3):714–23, doi:10.1002/ecy.2138.
15. Wagg C, Bender SF, Widmer F, Heijden MGA van der. Soil biodiversity and soil community composition determine ecosystem multifunctionality. *PNAS*. 2014 Apr 8;111(14):5266–70, doi:10.1073/pnas.1320054111.
16. Maron P-A, Sarr A, Kaisermann A, Lévêque J, Mathieu O, Guigue J, et al. High Microbial Diversity Promotes Soil Ecosystem Functioning. *Appl Environ Microbiol*. 2018 May 1;84(9):e02738-17, doi:10.1128/AEM.02738-17.
17. Philippot L, Spor A, Hénault C, Bru D, Bizouard F, Jones CM, et al. Loss in microbial diversity affects nitrogen cycling in soil. *The ISME Journal*. 2013 Aug;7(8):1609–19, doi:10.1038/ismej.2013.34.
18. Hug LA, Baker BJ, Anantharaman K, Brown CT, Probst AJ, Castelle CJ, et al. A new view of the tree of life. *Nature Microbiology*. 2016 May;1(5):16048, doi:10.1038/nmicrobiol.2016.48.
19. Steen AD, Crits-Christoph A, Carini P, DeAngelis KM, Fierer N, Lloyd KG, et al. High proportions of bacteria and archaea across most biomes remain uncultured. *ISME J*. 2019 Aug 6;1–5, doi:10.1038/s41396-019-0484-y.
20. Bižić-Ionescu M, Klintzsch T, Ionescu D, Hindiyeh MY, Günthel M, Muro-Pastor AM, et al. Widespread methane formation by Cyanobacteria in aquatic and terrestrial ecosystems. *bioRxiv*. 2019 Jul 8;398958, doi:10.1101/398958.
21. Lenhart K, Bunge M, Ratering S, Neu TR, Schüttmann I, Greule M, et al. Evidence for methane production by saprotrophic fungi. *Nature Communications*. 2012 Sep 4;3:1046, doi:10.1038/ncomms2049.
22. Perneger TV. What's wrong with Bonferroni adjustments. *BMJ*. 1998 Apr 18;316(7139):1236–8.

23. Rothman KJ. No Adjustments Are Needed for Multiple Comparisons. *Epidemiology*. 1990;1(1):43–6.
24. Thomas DC, Siemiatycki J, Dewar R, Robins J, Goldberg M, Armstrong BG. THE PROBLEM OF MULTIPLE INFERENCE IN STUDIES DESIGNED TO GENERATE HYPOTHESES. *Am J Epidemiol*. 1985 Dec 1;122(6):1080–95, doi:10.1093/oxfordjournals.aje.a114189.
25. Benjamini Y, Hochberg Y. Controlling the False Discovery Rate: A Practical and Powerful Approach to Multiple Testing. *Journal of the Royal Statistical Society Series B (Methodological)*. 1995;57(1):289–300.
26. Storey JD. A direct approach to false discovery rates. *Journal of the Royal Statistical Society: Series B (Statistical Methodology)*. 2002 Aug;64(3):479–98, doi:10.1111/1467-9868.00346.
27. Martiny JBH, Bohannan BJM, Brown JH, Colwell RK, Fuhrman JA, Green JL, et al. Microbial biogeography: putting microorganisms on the map. *Nature Reviews Microbiology*. 2006 Feb;4(2):102–12, doi:10.1038/nrmicro1341.
28. Wright S. Isolation by Distance. *Genetics*. 1943 Mar 29;28(2):114–38.
29. Berg JJ, Harpak A, Sinnott-Armstrong N, Joergensen AM, Mostafavi H, Field Y, et al. Reduced signal for polygenic adaptation of height in UK Biobank. Nordborg M, McCarthy MI, Nordborg M, Barton NH, Hermisson J, editors. *eLife*. 2019 Mar 21;8:e39725, doi:10.7554/eLife.39725.
30. Novembre J, Johnson T, Bryc K, Kutalik Z, Boyko AR, Auton A, et al. Genes mirror geography within Europe. *Nature*. 2008 Nov;456(7218):98–101, doi:10.1038/nature07331.
31. Kang HM, Sul JH, Service SK, Zaitlen NA, Kong S, Freimer NB, et al. Variance component model to account for sample structure in genome-wide association studies. *Nature Genetics*. 2010 Apr;42(4):348–54, doi:10.1038/ng.548.
32. Price AL, Patterson NJ, Plenge RM, Weinblatt ME, Shadick NA, Reich D. Principal components analysis corrects for stratification in genome-wide association studies. *Nature Genetics*. 2006 Aug;38(8):904–9, doi:10.1038/ng1847.
33. Meyer KM, Hopple AM, Klein AM, Morris AH, Bridgham S, Bohannan BJM. Community structure – ecosystem function relationships in the Congo Basin methane cycle depend on the physiological scale of function. *bioRxiv*. 2019 May 17;639989, doi:10.1101/639989.
34. Qin J, Li Y, Cai Z, Li S, Zhu J, Zhang F, et al. A metagenome-wide association study of gut microbiota in type 2 diabetes. *Nature*. 2012 Sep 26;490(7418):55–60, doi:10.1038/nature11450.
35. Callahan BJ, McMurdie PJ, Holmes SP. Exact sequence variants should replace operational taxonomic units in marker-gene data analysis. *The ISME Journal*. 2017 Dec;11(12):2639–43, doi:10.1038/ismej.2017.119.
36. McMurdie PJ, Holmes S. phyloseq: An R Package for Reproducible Interactive Analysis and Graphics of Microbiome Census Data. *PLOS ONE*. 2013 Apr 22;8(4):e61217, doi:10.1371/journal.pone.0061217.

37. R Core Team. R: A language and environment for statistical computing [Internet]. Vienna, Austria: R Foundation for Statistical Computing; 2019. Available from: <https://www.R-project.org/>
38. Love MI, Huber W, Anders S. Moderated estimation of fold change and dispersion for RNA-seq data with DESeq2. *Genome Biology*. 2014 Dec 5;15(12):550, doi:10.1186/s13059-014-0550-8.
39. McMurdie PJ, Holmes S. Waste Not, Want Not: Why Rarefying Microbiome Data Is Inadmissible. *PLOS Computational Biology*. 2014 Apr 3;10(4):e1003531, doi:10.1371/journal.pcbi.1003531.
40. Willis A, Bunge J. Estimating diversity via frequency ratios. *Biometrics*. 2015;71(4):1042–9, doi:10.1111/biom.12332.
41. Bray JR, Curtis JT. An Ordination of the Upland Forest Communities of Southern Wisconsin. *Ecological Monographs*. 1957;27(4):325–49, doi:10.2307/1942268.
42. Oksanen J, Blanchet FG, Friendly M, Kindt R, Legendre P, McGlinn D, et al. *vegan: Community Ecology Package* [Internet]. 2019 [cited 2019 Aug 13]. Available from: <https://CRAN.R-project.org/package=vegan>
43. Qu L, Guennel T, Marshall SL. Linear Score Tests for Variance Components in Linear Mixed Models and Applications to Genetic Association Studies: Linear Score Tests for Variance Components. *Biometrics*. 2013 Dec;69(4):883–92, doi:10.1111/biom.12095.
44. Wickham H, Chang W, Henry L, Pedersen TL, Takahashi K, Wilke C, et al. *ggplot2: Create Elegant Data Visualisations Using the Grammar of Graphics* [Internet]. 2019 [cited 2019 Aug 13]. Available from: <https://CRAN.R-project.org/package=ggplot2>
45. Belova SE, Pankratov TA, Detkova EN, Kaparullina EN, Dedysh SN. *Acidisoma tundrae* gen. nov., sp. nov. and *Acidisoma sibiricum* sp. nov., two acidophilic, psychrotolerant members of the Alphaproteobacteria from acidic northern wetlands. *International Journal of Systematic and Evolutionary Microbiology*,. 2009;59(9):2283–90, doi:10.1099/ijs.0.009209-0.
46. Chang Y, Land M, Hauser L, Chertkov O, Del Rio TG, Nolan M, et al. Non-contiguous finished genome sequence and contextual data of the filamentous soil bacterium *Ktedonobacter racemifer* type strain (SOSP1-21T). *Stand Genomic Sci*. 2011 Oct 1;5(1):97–111, doi:10.4056/sigs.2114901.
47. Domeignoz-Horta LA, DeAngelis KM, Pold G. Draft Genome Sequence of Acidobacteria Group 1 *Acidipila* sp. Strain EB88, Isolated from Forest Soil. *Microbiol Resour Announc*. 2019 Jan 3;8(1):e01464-18, doi:10.1128/MRA.01464-18.
48. Fritz I, Strömpl C, Abraham W-R. Phylogenetic relationships of the genera *Stella*, *Labrys* and *Angulomicrobium* within the ‘Alphaproteobacteria’ and description of *Angulomicrobium amanitifforme* sp. nov. *International Journal of Systematic and Evolutionary Microbiology*,. 2004;54(3):651–7, doi:10.1099/ijs.0.02746-0.
49. Meyer KM, Memiaghe H, Korte L, Kenfack D, Alonso A, Bohannan BJM. Why do microbes exhibit weak biogeographic patterns? *The ISME Journal*. 2018 Jun;12(6):1404–13, doi:10.1038/s41396-018-0103-3.

50. Vellend M. Conceptual Synthesis in Community Ecology. *The Quarterly Review of Biology*. 2010 Jun;85(2):183–206, doi:10.1086/652373.
51. Kerem B, Rommens JM, Buchanan JA, Markiewicz D, Cox TK, Chakravarti A, et al. Identification of the cystic fibrosis gene: genetic analysis. *Science*. 1989 Sep 8;245(4922):1073–80, doi:10.1126/science.2570460.
52. MacDonald ME, Novelletto A, Lin C, Tagle D, Barnes G, Bates G, et al. The Huntington's disease candidate region exhibits many different haplotypes. *Nat Genet*. 1992 May;1(2):99–103, doi:10.1038/ng0592-99.
53. Hindorff LA, Sethupathy P, Junkins HA, Ramos EM, Mehta JP, Collins FS, et al. Potential etiologic and functional implications of genome-wide association loci for human diseases and traits. *PNAS*. 2009 Jun 9;106(23):9362–7, doi:10.1073/pnas.0903103106.
54. Reich DE, Lander ES. On the allelic spectrum of human disease. *Trends in Genetics*. 2001 Sep 1;17(9):502–10, doi:10.1016/S0168-9525(01)02410-6.
55. McCalley CK, Woodcroft BJ, Hodgkins SB, Wehr RA, Kim E-H, Mondav R, et al. Methane dynamics regulated by microbial community response to permafrost thaw. *Nature*. 2014 Oct;514(7523):478–81, doi:10.1038/nature13798.
56. Swenson W, Wilson DS, Elias R. Artificial ecosystem selection. *PNAS*. 2000 Aug 1;97(16):9110–4, doi:10.1073/pnas.150237597.
57. Maxson T, Mitchell DA. Targeted treatment for bacterial infections: prospects for pathogen-specific antibiotics coupled with rapid diagnostics. *Tetrahedron*. 2016 Jun 23;72(25):3609–24, doi:10.1016/j.tet.2015.09.069.

## 331 **Tables and Figures**

332 Table 1. Functional gene abundance and ASV richness are not good predictors of methane oxidation  
333 rate. Linear models predicting methane oxidation rate from measures of microbial community  
334 structure.

| Term                    | Estimate | SE    | t-statistic | p-value | n  |
|-------------------------|----------|-------|-------------|---------|----|
| <i>pmoA</i> copy number | 0.019    | 0.011 | 1.700       | 0.096   | 42 |
| Richness                | 0.001    | 0.001 | 0.694       | 0.491   | 44 |

336  
337 Table 2. Mantel tests for each pair of dissimilarity matrices. Community distance matrix was based on  
338 Bray-Curtis distance while both environment and geography distance matrices were based on  
339 Euclidean distance. P-values determined by permutation test with 999 permutations.

| Terms                   | Mantel statistic (r) | 95% upper quantile of permutations | p-value |
|-------------------------|----------------------|------------------------------------|---------|
| Community ~ Environment | 0.479                | 0.096                              | 0.001   |
| Community ~ Geography   | 0.360                | 0.055                              | 0.001   |
| Environment ~ Geography | 0.241                | 0.060                              | 0.001   |

341



342 Table 3. Number of significant taxa after including each set of covariates in a variance component  
343 model. Removed and Added columns are relative to the no-covariate model. Significance is determined  
344 by controlling the false discovery rate at q-values < 0.05.  
345

| Terms           | Removed | Added | Significant |     |
|-----------------|---------|-------|-------------|-----|
| None            |         | 0     | 0           | 460 |
| Geo             |         | 338   | 21          | 14  |
| Com             |         | 460   | 0           | 0   |
| Env             |         | 281   | 1           | 180 |
| Geo + Env       |         | 458   | 0           | 2   |
| Geo + Env       |         | 377   | 13          | 96  |
| Com + Env       |         | 447   | 0           | 13  |
| Geo + Com + Env |         | 454   | 0           | 6   |

346  
347  
348

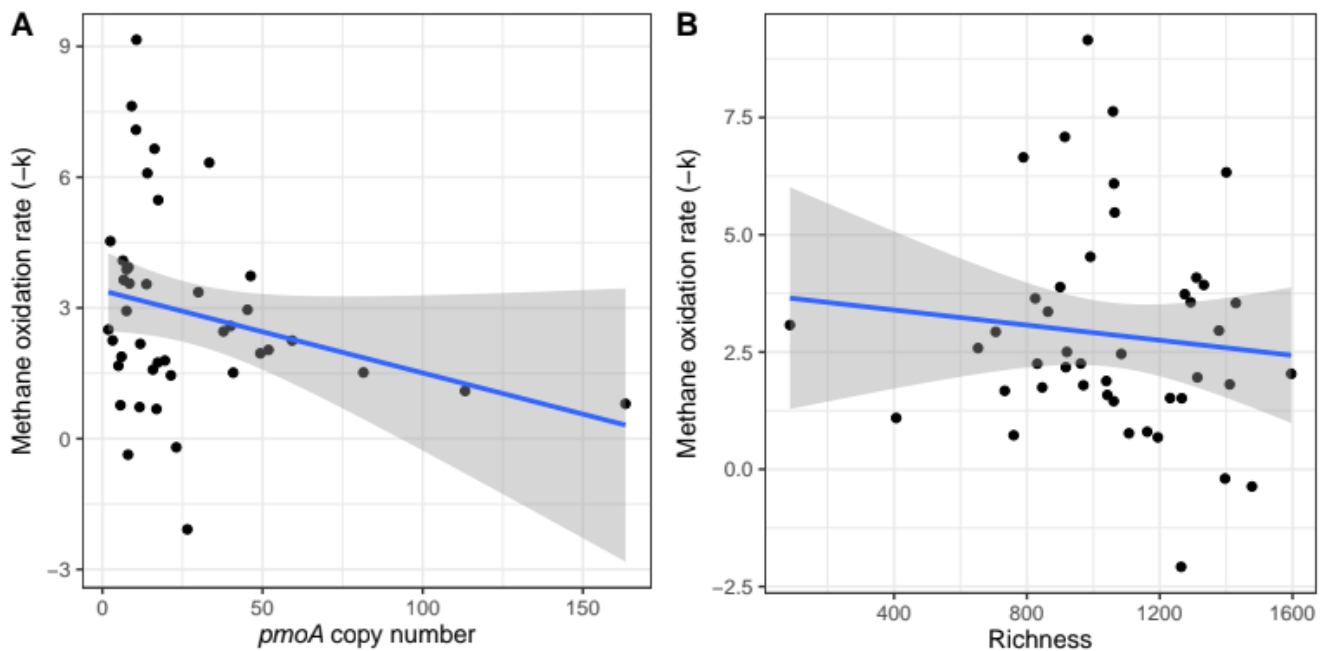

349  
350  
351  
352  
353  
354  
355

Figure 1. Methane oxidation rate is not correlated with functional gene abundance or ASV richness. Correlations between community attributes and ecosystem function. A) Abundance of the functional gene *pmoA* (n = 42) and B) ASV richness (n = 44). Lines represent the ordinary least squares regression line with standard errors.

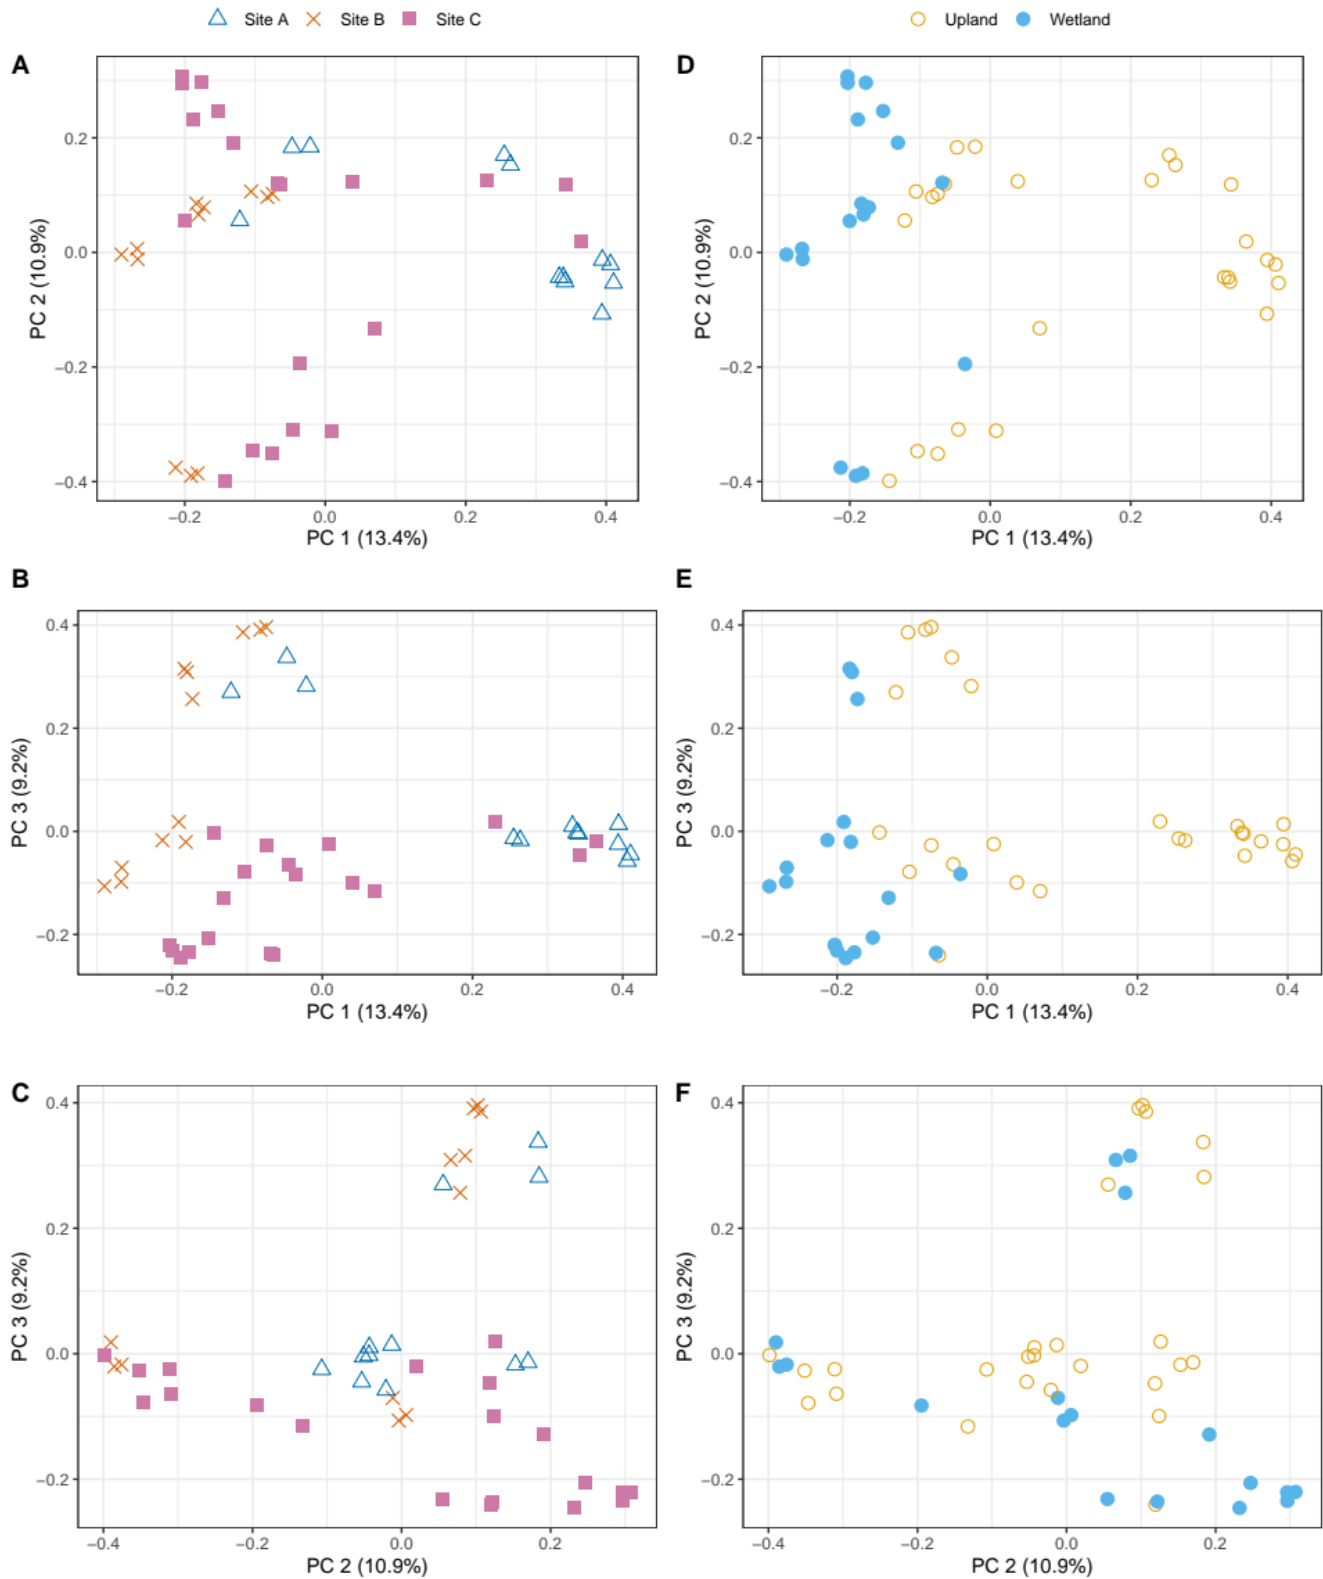

356  
357  
358  
359  
360

Figure 2. Microbial community composition is spatially and environmentally structured. Principle coordinate plots of Bray-Curtis distance representing the first three axes of community composition. In A, B, and C, points are identified by Site ID and in D, E, and F, points are identified by wetland or

361 upland ecosystem. All four environmental covariates separate strongly by wetland/upland. Axis length  
362 is proportional to variance explained as indicated in parentheses. PC = principal coordinate.  
363  
364

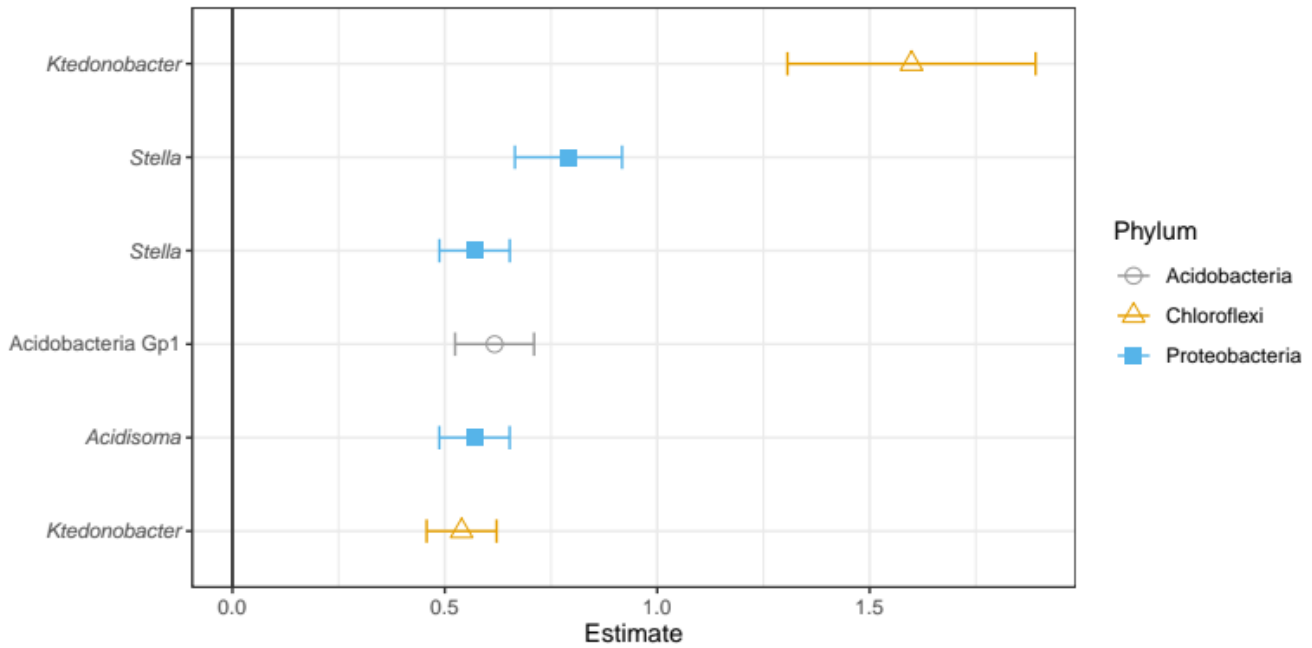

365  
366

367 Figure 3. Taxa associated with methane oxidation rates after controlling for geographic location,  
368 environmental similarity, and community composition. Points are estimates for the linear relationship  
369 between the relative abundance of a single ASV and methane oxidation rate with standard errors from  
370 variance component models including similarity matrices as covariates for community and  
371 environment and site ID for geographic location. Amplicon sequence variants are labelled at the finest  
372 resolution available: genus for all except the Group 1 Acidobacterium. Points are identified by Phylum.  
373 Significant taxa were determined by controlling the false discovery rate at q-value < 0.05.
